# Supplementary material
Source: HighWire-hosted journal article supplement (http://www.qdcxjkg.com/highwire/filestream/113826/field_highwire_adjunct_files/0/20120405_CFTR_BIOMARKERS_online_depository.pdf)
Supplement: 20120405_CFTR_BIOMARKERS_online_depository.pdf [file 20120405_CFTR_BIOMARKERS_online_depository.pdf]

## CFTR BIOMARKERS: TIME FOR PROMOTION TO SURROGATE ENDPOINT?

Authors: K De Boeck<sup>1</sup>, L Kent<sup>2,3</sup>, J Davies<sup>4</sup>, N Derichs<sup>5</sup>, M Amaral<sup>6,7</sup>, SM Rowe<sup>8</sup>, P Middleton<sup>9</sup>, H de Jonge<sup>10</sup>, M Wilschanski<sup>11</sup>, P Melotti<sup>12</sup>, I Danner-Boucher<sup>13</sup>, S Boerner<sup>14</sup>, I Fajac<sup>15</sup>, K Southern<sup>16</sup>, RA de Nooijer<sup>17</sup>, A Bot<sup>18</sup>, Y de Rijke<sup>19</sup>, E de Wachter<sup>20</sup>, T Leal<sup>21</sup>, F Vermeulen<sup>1</sup>, M Hug<sup>22</sup>, G Rault<sup>23</sup>, T Nguyen-Khoa<sup>24</sup>, C Barreto<sup>25</sup>, M Proesmans<sup>1</sup>, I Sermet-Gaudelus<sup>26</sup>

\*On behalf of the European Cystic Fibrosis Society Clinical Trial Network Standardisation Committee

Affiliations: <sup>1</sup>University Hospital of Leuven, Leuven, Belgium; <sup>2</sup>University of Ulster, Belfast, UK; <sup>3</sup>Belfast Health and Social Care Trust, Belfast, UK; <sup>4</sup>Department of Gene Therapy, National Heart and Lung Institute, Imperial College, London, UK; <sup>5</sup>CFTR Biomarker Centre & Cystic Fibrosis Centre, Department of Pediatric Pulmonology and Immunology, Charité University Berlin, Germany; <sup>6</sup>Centre for Human Genetics, National Institute of Health Dr Ricardo Jorge, Lisbon, Portugal; <sup>7</sup>Department of Chemistry and Biochemistry, Faculty of Sciences, University of Lisbon, Lisbon, Portugal; <sup>8</sup>Department of Medicine, University of Alabama, Birmingham, USA; <sup>9</sup>Ludwig Engel Centre for Respiratory Research, Westmead Millennium Institute, NSW, Australia; <sup>10</sup>Departments of Paediatric Gastroenterology and Biochemistry, Erasmus University Medical Centre, Rotterdam, The Netherlands; <sup>11</sup>Pediatric Gastroenterology Unit, Hadassah University Hospitals, Hebrew University Medical School, Jerusalem, Israel; <sup>12</sup>Centro Fibrosi Cistica, Azienda Ospedaliera Universitaria Integrata di Verona, Verona, Italy; <sup>13</sup>Laboratoire des Explorations Fonctionnelles and Service de Pneumologie, Hôpital G & R Laënnec, Nantes, France; <sup>14</sup>Klinik und Poliklinik für Kinder- und Jugendmedizin, Köln, Germany; <sup>15</sup>Service d'Explorations Fonctionnelles, Hôpital Cochin, Université Paris Descartes, Sorbonne Paris Cité, Paris, France; <sup>16</sup>Department of Women's and Children's Health, University of Liverpool, UK; <sup>17</sup>University Medical Centre, Utrecht, The Netherlands; <sup>18</sup>Department of Biochemistry, Sophia Children's Hospital, Erasmus MC, Rotterdam, The Netherlands; <sup>19</sup>Department of Internal Medicine, Erasmus University Medical Centre, Rotterdam, The Netherlands; <sup>20</sup>Department of Pediatric Pulmonology and CF-Clinic, Universitair Ziekenhuis Brussel, Brussels, Belgium; <sup>21</sup>Clinical Chemistry, Université Catholique de Louvain, Brussels, Belgium; <sup>22</sup>University Medical Centre, Freiburg, Germany; <sup>23</sup>Centre de Référence et de Compétence de la Mucoviscidose, Centre de Perharidy, Roscoff, France; <sup>24</sup>Departments of Biochemistry A and Paediatric Pulmonology, CRCM, Hôpital Necker-Enfants Malades AP-HP, Paris, France; <sup>25</sup>Department of Paediatrics, Hospital de Santa Maria, Lisbon, Portugal; <sup>26</sup>Hôpital Necker-Enfants Malades, Université Paris Descartes, INSERM U 845, Paris, France;

Corresponding author: K. De Boeck, University Hospital Gasthuisberg, CF Reference Centre, Herestraat 49, 3000 Leuven tel: +32 16 34 38 31 / fax: +32 16 34 38 17 / [Christiane.deboeck@uzleuven.be](mailto:Christiane.deboeck@uzleuven.be)

Online Data Supplement

| <b>Table S1 online supplement : NPD Discriminate Validity</b>         |                                |                                           |                                       |                                                              |                                                     |               |
|-----------------------------------------------------------------------|--------------------------------|-------------------------------------------|---------------------------------------|--------------------------------------------------------------|-----------------------------------------------------|---------------|
| <i>NPD indices discriminate between patients with and without CF.</i> |                                |                                           |                                       |                                                              |                                                     |               |
| <b>N and subject type</b>                                             |                                | <b>Basal potential<br/><i>p</i>-value</b> | <b>Δ Amiloride<br/><i>p</i>-value</b> | <b>Δ Low Chloride +<br/>Isoproterenol<br/><i>p</i>-value</b> | <b>Statistic</b>                                    | <b>Author</b> |
| 37<br>61                                                              | CF<br>non-CF                   | <0.05                                     | <0.05                                 | <0.05                                                        | MWU                                                 | (1)           |
| 46<br>40                                                              | CF<br>non-CF                   | 0.00001                                   | ND                                    | 0.00001                                                      | unpaired t-<br>test                                 | (2)           |
| 25<br>50                                                              | CF<br>non-CF                   | <0.05                                     | <0.05                                 | <0.05                                                        | Not reported<br>Assumed to<br>be unpaired<br>t-test | (3)           |
| 50<br>31                                                              | CF<br>non-CF                   | no overlap                                | no overlap                            | no overlap                                                   | 95% CI of<br>medians                                | (4)           |
| 8<br>10                                                               | CF<br>non-CF                   | ND                                        | <0.001                                | <0.001                                                       | MWU                                                 | (5)           |
| 31<br>50                                                              | CF<br>non-CF                   | 0.001                                     | 0.001                                 | 0.001                                                        | ANOVA                                               | (6)           |
| 37<br>29                                                              | CF<br>non-CF                   | <0.0001                                   | <0.0001                               | <0.0001                                                      | unpaired t-<br>test                                 | (7)           |
| 79<br>26                                                              | CF<br>non-CF<br>bronchiectasis | <0.0001                                   | <0.0001                               | <0.0001                                                      | MWU                                                 | (8)           |
| 51<br>12                                                              | CF<br>non-CF                   | <0.0001                                   | <0.0001                               | <0.0001*                                                     | unpaired t-<br>test<br>*MWU                         | (9)           |
| 10<br>10                                                              | CF<br>non-CF                   | <0.001                                    | <0.01                                 | <0.001                                                       | MWU                                                 | (10)          |
| 12<br>20                                                              | CF<br>non-CF                   | <0.0001                                   | <0.0001                               | <0.0001 *terbutaline                                         | unpaired t-<br>test                                 | (11)          |

|                        |                                                             |                                                                                                                            |            |            |                     |      |
|------------------------|-------------------------------------------------------------|----------------------------------------------------------------------------------------------------------------------------|------------|------------|---------------------|------|
| 104<br>40<br>117<br>58 | CF<br>CF (rhinitis)<br>non-CF (disease)<br>non-CF (healthy) | CF vs non-CF<br>(healthy) $p < 0.0001$<br>CF vs non-CF<br>(disease)<br>$p < 0.0001$<br>CF vs CF (rhinitis)<br>$p < 0.0001$ | ND         | ND         | MWU                 | (12) |
| 106<br>88              | CF<br>non-CF                                                | $< 0.0001$                                                                                                                 | $< 0.0001$ | ND         | unpaired t-<br>test | (13) |
| 17<br>31               | CF<br>non-CF                                                | 0.0001                                                                                                                     | 0.0001     | 0.0001     | Unpaired t-<br>test | (14) |
| 67<br>249              | CF<br>non-CF                                                | $< 0.05$                                                                                                                   | $< 0.05$   | $< 0.05$   | unpaired t-<br>test | (15) |
| 25<br>12               | CF<br>non-CF                                                | $< 0.0001$                                                                                                                 | $< 0.0001$ | $< 0.0001$ | MWU                 | (16) |
| 7<br>7                 | CF<br>non-CF                                                | $< 0.05$                                                                                                                   | ND         | ND         | not reported        | (17) |
| 64<br>26               | CF<br>CBAVD                                                 | $< 0.001$                                                                                                                  | $< 0.05$   | $< 0.05$   | ND                  | (18) |
| 60<br>145              | CF<br>non-CF                                                | No overlap                                                                                                                 | ND         | ND         | Individual<br>data  | (19) |
| 20<br>20               | CF<br>non-CF                                                | $< 0.002$                                                                                                                  | ND         | ND         | MWU                 | (20) |
| 13<br>22               | CF<br>non-CF                                                | no overlap                                                                                                                 | ND         | ND         | ANOVA               | (21) |
| 3<br>51                | CF<br>non-CF                                                | $< 0.05$                                                                                                                   | $< 0.05$   | ND         | unpaired t-<br>test | (22) |
| 19<br>22               | CF<br>non-CF                                                | $< 0.02$                                                                                                                   | ND         | ND         | MWU                 | (23) |
| 18                     | CF                                                          | $< 0.05$                                                                                                                   | $p < 0.05$ | ND         | unpaired t-         | (24) |

|    |        |  |  |  |      |  |
|----|--------|--|--|--|------|--|
| 34 | non-CF |  |  |  | test |  |
|----|--------|--|--|--|------|--|

|                                                                               |                                                   |            |       |        |                 |      |
|-------------------------------------------------------------------------------|---------------------------------------------------|------------|-------|--------|-----------------|------|
| 23                                                                            | CF                                                | No overlap | ND    | ND     | Individual data | (25) |
| 32                                                                            | Non-CF (disease)                                  |            |       |        |                 |      |
| 54                                                                            | Non-CF (healthy)                                  |            |       |        |                 |      |
| <i>NPD parameters differ between CF patients with severe and mild disease</i> |                                                   |            |       |        |                 |      |
| 92                                                                            | CF                                                |            |       |        |                 | (26) |
|                                                                               | $\Delta F508$ - $\Delta F508$ vs. mild genotype   | P<0.001    | NR    | P<0.01 | ANOVA           |      |
| 75                                                                            | CF                                                |            |       |        |                 | (27) |
|                                                                               | FEV <sub>1</sub> (top vs. bottom quartile)        | 0.03       | 0.04  | NS     | unpaired t-test |      |
|                                                                               | BMI (<18.5 vs. >18.5)                             | 0.03       | 0.05  | 0.01   | unpaired t-test |      |
|                                                                               | Symptoms at diagnosis                             | NS         | NS    | <0.005 | Tukey-Kramer    |      |
| 79                                                                            | CF                                                |            |       |        |                 | (8)  |
|                                                                               | PI vs. PS                                         | NS         | NS    | 0.01   | MWU             |      |
|                                                                               | FEV <sub>1</sub> <50% vs. FEV <sub>1</sub> >50%)  | 0.005      | 0.003 | NS     | MWUT            |      |
|                                                                               | Class I to III vs. class IV                       | 0.01       | NS    | NS     | MWU             |      |
| 24                                                                            | CF                                                |            |       |        |                 | (28) |
|                                                                               | mild vs. severe disease (WFH + FEV <sub>1</sub> ) | 0.07       | NS    | NS     | MWU             |      |
| 16                                                                            | CF (8 pairs)                                      |            |       |        |                 |      |
|                                                                               | mild vs. severe FEV <sub>1</sub>                  | ND         | NS    | <0.05  | paired t-test   |      |
| 22                                                                            | CF                                                |            |       |        |                 | (29) |

|                                                                                                                                                                                                                                                          |                                 |                                                          |                                       |                                                             |                                             |      |
|----------------------------------------------------------------------------------------------------------------------------------------------------------------------------------------------------------------------------------------------------------|---------------------------------|----------------------------------------------------------|---------------------------------------|-------------------------------------------------------------|---------------------------------------------|------|
|                                                                                                                                                                                                                                                          | Class I to II vs class III to V | NS                                                       | 0.04                                  | 0.01                                                        | ANOVA                                       |      |
| <i>NPD parameters differ between CF-PI, CF-PS, CBAVD and controls. NPD parameters increase incrementally across groups with no respiratory disease, carriers, diffuse idiopathic bronchiectasis and 0, 1 or 2 CFTR mutations, mild CF and severe CF.</i> |                                 |                                                          |                                       |                                                             |                                             |      |
| 55                                                                                                                                                                                                                                                       | CF (severe)                     | Increases incrementally across groups                    | Increases incrementally across groups | Increases incrementally across groups                       | ANOVA                                       | (26) |
| 37                                                                                                                                                                                                                                                       | CF (mild)                       |                                                          |                                       |                                                             |                                             |      |
| 85                                                                                                                                                                                                                                                       | DB (0 CFTR)                     |                                                          |                                       |                                                             |                                             |      |
| 22                                                                                                                                                                                                                                                       | DB (1 CFTR)                     |                                                          |                                       |                                                             |                                             |      |
| 15                                                                                                                                                                                                                                                       | DB (2 CFTR)                     |                                                          |                                       |                                                             |                                             |      |
| 38                                                                                                                                                                                                                                                       | carriers (healthy)              |                                                          |                                       |                                                             |                                             |      |
| 26                                                                                                                                                                                                                                                       | non-CF (healthy)                |                                                          |                                       |                                                             |                                             |      |
| 26                                                                                                                                                                                                                                                       | CF-PI                           | no overlap: CF-PI vs. CF-PS                              | no overlap: CF-PI vs. CF-PS           | no overlap: CF vs. CBAVD, carrier or non-CF                 | 95% CI medians                              | (4)  |
| 24                                                                                                                                                                                                                                                       | CF-PS                           | CF vs. CBAVD, carriers or non-CF                         | CF-PI vs. CBAVD, carrier or non-CF    |                                                             |                                             |      |
| 60                                                                                                                                                                                                                                                       | CBAVD                           |                                                          |                                       |                                                             |                                             |      |
| 21                                                                                                                                                                                                                                                       | carriers                        |                                                          |                                       |                                                             |                                             |      |
| 31                                                                                                                                                                                                                                                       | non-CF                          |                                                          |                                       |                                                             |                                             |      |
| 39                                                                                                                                                                                                                                                       | CF-PI                           | P<.0001 vs CBAVD                                         | P<.05 vs CBAVD                        | P<.0005vs non-CF,                                           | unpaired t-test                             | (18) |
| 25                                                                                                                                                                                                                                                       | CF-PS                           | P<.0001 vs CBAVD                                         | P<.05 vs CBAVD                        | P<.05 vs CBAVD                                              |                                             |      |
| 20                                                                                                                                                                                                                                                       | CBAVD                           | NS vs non-CF                                             | NS vs non -CF                         | P<.005 vs non -CF, p<.05 vs CF-PI and PS                    |                                             |      |
| 50                                                                                                                                                                                                                                                       | non-CF (healthy)                |                                                          |                                       | (Zero chloride)                                             |                                             |      |
| <i>NPD parameters correlate with other endpoints and clinical measurements</i>                                                                                                                                                                           |                                 |                                                          |                                       |                                                             |                                             |      |
| 79                                                                                                                                                                                                                                                       | CF                              | FEV1% pred: p=0.04, r= 0.24<br>FVC% pred: p=0.03, r=0.25 | p=0.009, r=-0.29<br>p=0.01, r=-0.28   | NS<br>NS                                                    | Spearman correlation coefficient            | (8)  |
| 51                                                                                                                                                                                                                                                       | CF                              | NS for FEV1, CXR, Shwachman score                        |                                       | NS for sweat chloride BMI, symptoms at diagnosis, MI, CF-RD | Pearson or Spearman correlation coefficient | (9)  |

|    |    |                                                                                                  |    |    |                                       |      |
|----|----|--------------------------------------------------------------------------------------------------|----|----|---------------------------------------|------|
| 60 | CF | FEV1: $r=-0.27$ ,<br>$p<0.05$<br>FVC: $r=-0.26$ ,<br>$p<0.05$<br>Weight: $r=-0.37$ ,<br>$p<0.01$ | ND | ND | Pearson<br>correlation<br>coefficient | (19) |
|----|----|--------------------------------------------------------------------------------------------------|----|----|---------------------------------------|------|

| Patients grouped by NPD result differ in clinical presentation                                             |                                                          |                                                              |         |                             |        |
|------------------------------------------------------------------------------------------------------------|----------------------------------------------------------|--------------------------------------------------------------|---------|-----------------------------|--------|
| N and subject type                                                                                         |                                                          | Characteristic compared                                      | p-value | Statistic                   | Author |
| 22                                                                                                         | CF                                                       | Low Cl- secretors had lower FEV1                             | <0.05   |                             | (29)   |
|                                                                                                            | High Cl- secretors (>10mV) vs. low Cl- secretors (<10mV) | Low Cl- secretors had higher Northern Score                  | 0.03    |                             |        |
| <i>Composite NPD indices are highly indicative of disease in groups of patients with "questionable" CF</i> |                                                          |                                                              |         |                             |        |
| <i><math>e^{(total\ chloride\ response/amiloride\ response)}</math>, value &gt;0.7 = CF</i>                |                                                          |                                                              |         |                             |        |
| 70                                                                                                         | Questionable CF<br>24 CF<br>46 non-CF                    | CF younger                                                   | 0.013   | unpaired t-test             | (6)    |
|                                                                                                            |                                                          | CF had higher sweat Cl                                       | <0.001  |                             |        |
|                                                                                                            |                                                          | CF had higher frequency of CFTR mutations                    | <0.001  |                             |        |
| 56                                                                                                         | Questionable CF<br>17 CF<br>39 non-CF                    | CF had higher frequency of abdominal pain                    | 0.018   | $\chi^2$ test               | (30)   |
|                                                                                                            |                                                          | CF had higher frequency of sinusitis                         | <0.01   |                             |        |
| <i>-0.11[<math>\Delta</math>low chloride + isoproterenol] - 0.05[amiloride], value &lt;0.27 = CF</i>       |                                                          |                                                              |         |                             |        |
| 50                                                                                                         | Questionable CF<br>15 CF<br>35 non-CF                    | CF younger                                                   | 0.01    | MWU<br>*Fisher's exact test | (31)   |
|                                                                                                            |                                                          | CF had higher frequency of cough and sputum                  | 0.04*   |                             |        |
|                                                                                                            |                                                          | CF had higher frequency of lower respiratory tract infection | 0.03    |                             |        |
|                                                                                                            |                                                          | CF had higher frequency of chronic <i>Staph. aureus</i>      | 0.009*  |                             |        |
| 21                                                                                                         | Questionable CF<br>13 CF<br>8 non-CF                     | CF had higher sweat Cl at follow-up                          | 0.03    | MWU                         | (32)   |
|                                                                                                            |                                                          | CF had higher frequency of lower respiratory tract infection | 0.007   |                             |        |

MWU Mann-Whitney U, ND no data, NS not significant, WFH weight for height, CI confidence interval, NPD nasal potential difference, CF cystic fibrosis, PI pancreatic insufficient, PS pancreatic sufficient, CBAVD congenital bilateral absence of vas deferens, BMI body mass index, FEV<sub>1</sub> forced expiratory volume in one second



| <b>Table S2 online supplement : Reference values for NPD in subjects with CF</b> |                            |                                      |                                        |                    |                                                      |                         |               |
|----------------------------------------------------------------------------------|----------------------------|--------------------------------------|----------------------------------------|--------------------|------------------------------------------------------|-------------------------|---------------|
| <b>N</b>                                                                         | <b>Adults vs. children</b> | <b>Additional info</b>               | <b>Basal potential (*Max PD)</b>       | <b>Δ Amiloride</b> | <b>Δ Low chloride + isoproterenol (*terbutaline)</b> | <b>Statistic</b>        | <b>Author</b> |
| 37                                                                               | Adult                      |                                      | -47.3 (15.3)                           | 29.4 (12.7)        | 1.6 (8.4)                                            | Mean (SD)               | (33)          |
| 7                                                                                | Adult + child              |                                      | -27.6(5.8)                             | NR                 | NR                                                   | Mean (SE)               | (17)          |
| 20                                                                               | Adult                      |                                      | -45(8)                                 | NR                 | NR                                                   | Mean (SD)               | (20)          |
| 60                                                                               | Adult + child              |                                      | -46.1 (-33 to -77)<br>[-27.7 to -64.5] | NR                 | NR                                                   | Mean (range)<br>[95%CI] | (19)          |
| 37                                                                               | Adult                      | Mild disease                         | -43 (2)                                | 26 (2)             | -1 (1)                                               | Mean (SEM)              | (26)          |
| 55                                                                               | Adult                      | ΔF508- ΔF508                         | -52 (2)                                | 30 (2)             | +2 (1)                                               | Mean (SEM)              | (26)          |
| 11                                                                               | Adult + child              | Premature stop mutation              | -36.18 (17.16)<br>-37.73(10.87)        | NR                 | 3.97(3.50)<br>3.89(3.91)                             | Mean (SD)               | (34)          |
| 18                                                                               | Adult + child              | No premature stop mutation           | -42.09(10.12)                          | NR                 | 2.99(3.48)                                           | Mean (SD)               | (34)          |
| 8                                                                                | Adult                      | ΔF508- ΔF508                         | -37.8(2.8)                             | NR                 | NR                                                   | Mean (SEM)              | (5)           |
| 37                                                                               | Adult + child              |                                      | -39(8)[-28 to -57]                     | NR                 | NR                                                   | Mean (SD)<br>[range]    | (35)          |
| 18                                                                               | Adult + child              | Borderline sweat                     | -39(6)[-29 to -52]                     | NR                 | NR                                                   | Mean (SD)<br>[range]    | (35)          |
| 13                                                                               | Adult                      | Medial part of inferior turbinate    | -31.0(2.7)                             | NR                 | NR                                                   | Mean (SEM)              | (11)          |
|                                                                                  |                            | Posterior part of inferior turbinate | -38.9(1.6)                             | NR                 | NR                                                   |                         |               |
|                                                                                  |                            | Most negative PD                     | -42.9(4.7)                             | 32.4(3.7)          | -0.7(0.6)                                            |                         |               |
| 95                                                                               | Adult                      |                                      | -38.0(8.2)[-20.6 to -62.5]             | NR                 | NR                                                   | Mean (SD)<br>[range]    | (36)          |
| 79                                                                               | Adult                      |                                      | -47 [-91 to -19]                       | 29 [4 to 68]       | 2 [-8 to 17]                                         | Median [range]          | (8)           |

|    |               |                                           |                        |             |                    |                 |      |
|----|---------------|-------------------------------------------|------------------------|-------------|--------------------|-----------------|------|
| 4  | Adult         |                                           | -41.4 (5.9)            | NR          | NR                 | Mean (SEM)      | (37) |
| 4  | Adult         |                                           | -49.3 (5.0)            | NR          | NR                 | Mean (SEM)      | (37) |
| 4  | Adult         |                                           | -51.3 (4.7)            | NR          | NR                 | Mean (SEM)      | (37) |
| 29 | Adult + child | Pancreatic insufficient                   | *-54(9)                | NR          | 3.6(4.7)           | Mean (SD)       | (38) |
| 27 | Adult + child | Pancreatic sufficient                     | *-45(12)               | NR          | 1.7(5.2)           | Mean (SD)       | (38) |
| 3  | Neonate       |                                           | -51.3 (8.0)            | NR          | NR                 | Mean (SEM)      | (22) |
| 19 | Adult         | Tip of inferior turbinate                 | -10(5.5)               | NR          | NR                 | Mean (SD)       | (23) |
|    |               | Distal inferior turbinate                 | -25(13.3)              | NR          | NR                 |                 |      |
|    |               | Most negative value of inferior turbinate | -36(18.6)              | NR          | NR                 |                 |      |
| 9  | Adult         | Pre-treatment (active nostril)            | -53.3(4.0)             | 36.9 (4.7)  | -4.5 (1.5)         | Mean (SEM)      | (14) |
|    |               | Pre-treatment (placebo nostril)           | -49.7 (4.4)            | 35.6(5.4)   | -2.8(1.4)          |                 |      |
| 7  | Adult + Child |                                           | -33.6 (10.0)           | 26.1 (11.0) | NR                 | Mean (SEM)      | (39) |
| 40 | Adult + Child | Sub-cutaneous                             | -55.8(1.5)             | NR          | NR                 | Mean (SEM)      | (12) |
|    |               | Epi-cutaneous                             | -47.8(1.5)             | NR          | NR                 |                 |      |
| 35 | Adult         |                                           | -49.3 (2.1)            | NR          | NR                 | Mean (SEM)      | (40) |
| 12 | Adult         |                                           | -47.9 (2.5)            | NR          | NR                 | Mean (SEM)      | (40) |
| 23 | Adult         | Premature stop mutation                   | -40 [-67 to -29]       | NR          | 1.25 [-4.9 to 8.0] | Median [range]  | (41) |
| 23 | Adult + Child |                                           | -53.0 (1.8)            | NR          | NR                 | Mean (SEM)      | (42) |
| 20 | Adult         |                                           | -70.8 (4.7)            | 48.0(1.9)   | NR                 | Mean (SEM)      | (24) |
| 12 | Adult         |                                           | -54.0 [-57.1 to -49.6] | NR          | 0 [0.1 to 1.8]     | Median [95% CI] | (43) |
|    |               |                                           | -53.3 (12.9)           | NR          | 0.32 (2.67)        | Mean (SD)       |      |

|    |                    |                               |                               |                            |                         |                    |      |
|----|--------------------|-------------------------------|-------------------------------|----------------------------|-------------------------|--------------------|------|
| 75 | Adult              | $\Delta F508$ - $\Delta F508$ | *-49.6 [-52.4 to -46.8]       | 32.1 [29.2 to 34.9]        | -1.5 [-0.2 to -2.7]     | Mean [95%CI]       | (27) |
| 25 | Adult              |                               | -46.5 (2.0)                   | 23.9 (1.9)                 | 1.4 (0.4)               | Mean (SEM)         | (16) |
| 46 | Adult              |                               | -47.5 (1.7) [-43 to -52]      | 27.8 (1.7) [23.3 to 32.3]  | 0.1 (0.4) [-1.1 to 1.3] | Mean (SEM) [95%CI] | (2)  |
| 25 | Adult              | $\Delta F508$ - $\Delta F508$ | -45 [-32 to -58]              | NR                         | NR                      | Mean [range]       | (18) |
| 10 | Adult              |                               | -26.6 (12.1)                  | 13.6 (9.7)                 | 1.4 (1.4)               | Mean (SD)          | (44) |
| 10 | Adult              |                               | -36.8 (0.7)                   | NR                         | NR                      | Mean (SD)          | (45) |
| 10 | Adult              |                               | -36.0 (1.6)                   | NR                         | NR                      |                    |      |
| 10 | Adult              |                               | -39.1 (1.4)                   | NR                         | NR                      |                    |      |
| 10 | Adult              |                               | -36.3 (5.2)                   | 20.2 (5.4)                 | 5.2 (2.0)               | Mean (SD)          | (46) |
| 13 | Adult + child      |                               | NR                            | 38(4)                      | NR                      | Mean (SD)          | (21) |
| 37 | Child              |                               | -47 (2.6)                     | 24 (2.2)                   | 1 (1.3)                 | Mean (SEM)         | (7)  |
| 9  | Adolescent + child | Y122X                         | -56 (10)                      | 20 (6)                     | -0.8 (1.3)              | Mean (SD)          | (47) |
| 4  | Adolescent + child | Other stop mutation           | -53 (11)                      | 22 (15)                    | -0.2 (0.5)              |                    |      |
| 5  | Adolescent + child | No stop mutation              | -52 (8)                       | 19 (12)                    | 0 (0.5)                 |                    |      |
| 67 | Adult + child      |                               | -51 (16)                      | 28 (17)                    | 0 (7)                   | Median (IQR)       | (32) |
| 89 | Child              |                               | -57 (12)                      | 32.7 (14)                  | 1.6 (4.7)               | Mean (SD)          | (31) |
| 30 | Child              | Premature stop mutation       | NR                            | NR                         | -0.3 [-4.6 to 14.6]     | Median [range]     | (48) |
| 6  | NR                 |                               | -52.2 (3.3)                   | 26.1 (2.4)                 | NR                      | Mean (SEM)         | (49) |
| 4  | Adult              | Standard method               | -46.2 (7.1)                   | 32.1 (6.0)                 | 2.6 (0.9)               | Mean (SEM)         | (50) |
|    |                    | Modified method               | -45.6 (6.6)                   | 34.9 (5.6)                 | 4.6 (0.8)               |                    |      |
| 31 | Adult              |                               | -45.3 (11.5) [-49.5 to -41.1] | 29.8 (11.3) [25.6 to 33.9] | 3.2 (3.5) [1.9 to -4.5] | Mean (SD) [95%CI]  | (51) |
| 34 | Adult + child      | Floor                         | *-41.5 [-49.5 to -30.5]       | 28 [17 to 39]              | 1 [0 to 3]              | Median [IQR]       | (1)  |
|    |                    | Turbinates                    | *-46.5 [-54.5 to -            | 34.5 [20 to 41]            | 2 [1 to 5]              |                    |      |

|    |               |                                                 |              |            |            |            |      |           |     |
|----|---------------|-------------------------------------------------|--------------|------------|------------|------------|------|-----------|-----|
|    |               |                                                 | 36.5]        |            |            |            |      |           |     |
| 5  | Adult + child | G542X or R553X<br>(36 hospital admissions)      | *-39 (9)     | 15 (8)     | 2 (4)      | Mean (SD)  | (10) |           |     |
| 5  | Adult + child | A544E (10 hospital admissions)                  | *-57 (5)     | 28 (10)    | 4 (8)      |            |      |           |     |
| 5  | NR            | $\Delta$ F508- $\Delta$ F508                    | *-43 (9)     | 27 (8)     | 5 (4)      |            |      |           |     |
| 51 | Child         |                                                 | *-46.6 (1.9) | 35.1 (2.2) | -1.7 (0.8) | Mean (SEM) | (9)  |           |     |
| 17 | Adult + child |                                                 | -45 (16)     | 33 (14)    | 3 (4)      | Mean (SD)  | (52) |           |     |
| 9  | Adult + child |                                                 | -44 (11)     | 29 (7)     | -0.6 (1.5) |            |      |           |     |
| 31 | Adult + child |                                                 | -49 (13)     | 35 (11)    | 3 (6)      | Mean (SD)  | (6)  |           |     |
| 11 | Adult + child | Homozygous premature stop mutation (baseline)   | -48 (10)     | 33 (9)     | 0.4 (4.6)  | Mean (SD)  | (53) |           |     |
| 11 | Adult + child | Homozygous premature stop mutation (placebo)    | -46 (10)     | 34 (11)    | -0.4 (2.7) |            |      |           |     |
| 8  | Adult + child | Heterozygous premature stop mutation (baseline) | -42 (3)      | 32 (7)     | -0.5 (2)   |            |      |           |     |
| 8  | Adult + child | Heterozygous premature stop mutation (placebo)  | -41 (10)     | 27 (10)    | -0.25 (2)  |            |      |           |     |
| 5  | Adult + child | $\Delta$ F508- $\Delta$ F508 (baseline)         | -45 (11)     | 32 (14)    | 2.2 (5)    |            |      |           |     |
| 5  | Adult + child | $\Delta$ F508- $\Delta$ F508 (placebo)          | -41 (14)     | 26 (10)    | 1.2 (2)    |            |      |           |     |
| 24 | Adult         | Pancreatic sufficient                           | -44 (13)     | 27 (12)    | 2 (5)      |            |      | Mean (SD) | (4) |

|    |       |                             |                    |           |                |               |      |
|----|-------|-----------------------------|--------------------|-----------|----------------|---------------|------|
| 26 | Adult | Pancreatic insufficient     | -54 (9)            | 36 (8)    | 4 (5)          |               |      |
| 36 | Adult |                             | -44(9)[-31 to -65] | NR        | 2(4)[-6 to 12] | Mean (SD) [?] | (54) |
| 25 | Adult | 1 <sup>st</sup> measurement | -40(12)            | 27(9)     | 2.1(3.8)       | Mean (SD)     | (3)  |
|    |       | 2 <sup>nd</sup> measurement | -39(11)            | 26(10)    | 0.4(2.9)       |               |      |
| 4  | Adult | Pre-drug                    | -35.8(9.5)         | 21.9(6.8) | 0.78(3.3)      | Mean (SEM)    | (55) |
|    |       | Pre-vehicle                 | -29.7(8.0)         | 11.4(8.3) | 2.1(4.5)       |               |      |

**Table S3 online supplement : Reference values for NPD in healthy controls**

| <b>N</b> | <b>Age group</b> | <b>Additional info</b>                    | <b>Basal potential (*Max PD)</b> | <b>Δ Amiloride</b> | <b>Δ Low chloride + isoproterenol (*terbutaline)</b> | <b>Statistic</b>       | <b>Author</b> |
|----------|------------------|-------------------------------------------|----------------------------------|--------------------|------------------------------------------------------|------------------------|---------------|
| 20       | Adult            |                                           | -18 (5)                          | NR                 | NR                                                   | Mean (SD)              | (20)          |
| 64       | Adult + child    |                                           | -19.0 (-8 to -30)                |                    |                                                      | Mean (range)           | (19)          |
| 7        | Adult + child    |                                           | -27.6 (5.8)                      | NR                 | NR                                                   | Mean (SE)              | (17)          |
| 26       | Adult            |                                           | -16 (2)                          | 7 (1)              | -5 (1)                                               | Mean (SEM)             | (26)          |
| 32       | Adult            | Room temperature                          | -19.3 (6.9)                      | 10.4 (5.6)         | -6.9(6.4)                                            | Mean (SD)              | (56)          |
|          |                  | Warmed                                    | -18.8 (7.7)                      | 11.0 (6.1)         | -13.3(8.8)                                           |                        |               |
| 10       | Adult            |                                           | -17.2 (0.76)                     | NR                 | NR                                                   | Mean (SEM)             | (5)           |
| 24       | Adult + child    |                                           | -15 (4) [-6 to -23]              | NR                 | NR                                                   | Mean (SD)<br>[range]   | (35)          |
| 32       | Adult            | Medial part of inferior turbinate         | 10.3 (1.2)                       | NR                 | NR                                                   | Mean (SEM)<br>[95% CI] | (11)          |
|          |                  | Posterior part of inferior turbinate      | 3.2 (0.9)                        | NR                 | NR                                                   |                        |               |
|          |                  | Most negative PD                          | -15.1 (1.8) [+1 to -32]          | 10.1 (1.2)         | -13.2(1.8)                                           |                        |               |
| 50       | Adult            |                                           | -25 (8)*                         | NR                 | -24.6(10.4)                                          | Mean (SD)              | (38)          |
| 24       | Neonate          |                                           | -16.4 (0.8)                      | NR                 | NR                                                   | Mean (SEM)             | (22)          |
| 22       | Adult            | Tip of inferior turbinate                 | -10 (3.7)                        | NR                 | NR                                                   | Men (SD)               | (23)          |
|          |                  | Distal inferior turbinate                 | -13 (4.6)                        |                    |                                                      |                        |               |
|          |                  | Most negative value of inferior turbinate | -17 (5.1)                        |                    |                                                      |                        |               |
| 9        | Adult            |                                           | -7.1 (5.1)                       | 10 (3.1)           | NR                                                   | Mean (SEM)             | (39)          |

|    |               |              |             |    |    |            |      |
|----|---------------|--------------|-------------|----|----|------------|------|
| 58 | Adult + Child | Subcutaneous | -15.1 (1.4) | NR | NR | Mean (SEM) | (12) |
|    |               | Epicutaneous | -17.9 (0.8) |    |    |            |      |

|     |                 |                                        |             |            |             |            |      |
|-----|-----------------|----------------------------------------|-------------|------------|-------------|------------|------|
| 10  | Adult (young ♀) | Anterior surface of inferior turbinate | -2.9 (0.3)  | NR         | NR          | Mean (SEM) | (25) |
|     |                 | Medial surface of inferior turbinate   | -13.7 (1.5) |            |             |            |      |
|     |                 | Inferior surface of inferior turbinate | -26.9 (2.7) |            |             |            |      |
|     |                 | Floor                                  | -20.6 (3.2) |            |             |            |      |
|     |                 | Septum                                 | -13.1 (1.5) |            |             |            |      |
| 10  | Adult (young ♂) | Anterior surface of inferior turbinate | -4.0 (0.5)  | NR         | NR          |            |      |
|     |                 | Medial surface of inferior turbinate   | -13.6 (1.4) |            |             |            |      |
|     |                 | Inferior surface of inferior turbinate | -23.3 (1.7) |            |             |            |      |
|     |                 | Floor                                  | -14.7 (3.2) |            |             |            |      |
|     |                 | Septum                                 | -10.5 (0.9) |            |             |            |      |
| 8   | Adult (older ♂) | Anterior surface of inferior turbinate | -5.2 (0.6)  | NR         | NR          |            |      |
|     |                 | Medial surface of inferior turbinate   | -11.4 (1.1) |            |             |            |      |
|     |                 | Inferior surface of inferior turbinate | -16.5 (1.5) |            |             |            |      |
|     |                 | Floor                                  | -9.4 (2.2)  |            |             |            |      |
|     |                 | Septum                                 | -8.7 (0.8)  |            |             |            |      |
| 54  | Adult           |                                        | -24.7 (0.9) | NR         | NR          | Mean (SEM) | (42) |
| 43  | Adult           |                                        | -27.9 (1.3) | 22.8 (2.5) | NR          | Mean (SEM) | (24) |
| 176 | Adult + child   |                                        | -22.3 (0.6) | NR         | NR          | Mean (SEM) | (15) |
| 27  | NR              |                                        | -17 (1.3) * | NR         | -14.7 (1.3) | Mean (SD)  | (57) |
| 12  | Adult           |                                        | -15.9 (1.2) | 8.7 (0.7)  | -10.0(1.1)  | Mean (SEM) | (16) |
| 6   | Adult           |                                        | -14.0 (0.8) | 8.1 (0.6)  | -26.2(1.1)  | Mean (SEM) | (2)  |



|    |       |  |             |           |          |           |      |
|----|-------|--|-------------|-----------|----------|-----------|------|
| 11 | Adult |  | -13.2 (4.6) | 4.5 (2.5) | -13(8.4) | Mean (SD) | (44) |
|----|-------|--|-------------|-----------|----------|-----------|------|

|    |       |                 |                                 |                              |                                 |                      |      |
|----|-------|-----------------|---------------------------------|------------------------------|---------------------------------|----------------------|------|
| 17 | Adult |                 | -26 (2) *                       | 10 (2)                       | NR                              | Mean (SEM)           | (21) |
|    |       |                 | -15 (2) *                       |                              |                                 |                      |      |
| 32 | Adult |                 | -15 (1.5)                       | 7.1 (1.2)                    | -15(1.7)                        | Mean (SEM)           | (7)  |
| 29 | NR    |                 | -15 (11)*                       | 6 (6.7)                      | -15(11)                         | Median(IQR)          | (32) |
| 33 | NR    |                 | -16.8 (6.5)                     | 7.7 (5)                      | -18.3 (10.6)                    | Mean (SD)            | (31) |
| 6  | Adult |                 | -14.7 (4)                       | 8.1 (1.3)                    | NR                              | Mean (SEM)           | (58) |
| 6  | Adult | Standard method | -20.7 (1.7)                     | 12.4 (1.7)                   | -12.4 (1.3)                     | Mean (SEM)           | (50) |
|    |       | Modified method | -18.5 (1.2)                     | 13.0 (0.8)                   | -13.9(1.7)                      |                      |      |
| 52 | Adult |                 | -18.2 (8.3)<br>[-20.5 to -15.9] | 10.5 (6.1)<br>[8.8 to -12.2] | -23.7(10.2)<br>[-26.5 to -20.9] | Mean (SD)<br>[95%CI] | (51) |
| 56 | Adult | Floor           | -16 (-20.5 to -12)*             | 7 (5 to 9.5)                 | -14(-18.5 to -9)                | Median (IQR)         | (1)  |
|    |       | Turbinates      | -15.5 (-23 to -12.5)*           | 7 (5 to 10)                  | -14.5 (-21 to -10)              |                      |      |
| 10 | Adult |                 | -26 (5) *                       | 8 (4)                        | -12(7)                          | Mean (SD)            | (10) |
| 12 | NR    |                 | -19.8 (2.7)*                    | 13.7 (1.6)                   | -15.7(2.3)                      | Mean (SEM)           | (9)  |
| 35 | Adult |                 | -19 (8)                         | 10.5 (5)                     | -13(8)                          | Mean (SD)            | (52) |
| 50 | Adult |                 | -16 (5)                         | 10 (4)                       | -12(7)                          | Mean (SD)            | (6)  |
| 25 | Adult |                 | -24 (8)                         | 13 (4)                       | -16(12)                         | Mean (SD)            | (4)  |
| 39 | Adult |                 | -20 (8) [-9 to -44]             | NR                           | -21(9) [-5 to -44]              | Mean (SD)[range]     | (54) |
| 50 | NR    |                 | -16 (5)                         | 10 (4)                       | -12(7)                          | Mean (SD)            | (3)  |
| 4  | Adult | Pre-drug        | -14.8 (3.7)                     | 3.6 (5.3)                    | -5.0 (7.0)                      | Mean (SEM)           | (55) |
|    |       | Pre-vehicle     | -9.6 (2.4)                      | 4.8 (1.9)                    | -7.2 (1.4)                      |                      |      |

**Table S4 online supplement: Sweat chloride reliability***Despite the general consensus that the sweat test remains the best diagnostic test for CF, very few recent studies report on sweat test reliability*

| <b>N and subject type</b>                 | <b>N measurements</b> | <b>Results</b>                                                                                                                                                          | <b>Statistic</b>             | <b>Author</b> |
|-------------------------------------------|-----------------------|-------------------------------------------------------------------------------------------------------------------------------------------------------------------------|------------------------------|---------------|
| 295 subjects tested for clinical purposes | 2                     | 21 ± 4.3 mmol/L, 20.2%                                                                                                                                                  | mean ± SD, CV                | (59)          |
| 47 subjects with Cl <sup>-</sup> 30-70    |                       | ND± 7.2 mmol/L, 17.2%                                                                                                                                                   |                              |               |
| 4 non-CF                                  | 8-12                  | subject 1: 12.8, (3.3), 26%, [7 to 19]<br>subject 2: 15.5, (5.1), 33%, [6 to 24]<br>subject 3: 36.4, (10.6), 29%, [16 to 57]<br>subject 4: 38.4, (5.5), 14%, [28 to 49] | Mean, (SD), CV, [95%CI]      | (60)          |
| 1 non-CF                                  | 6                     | 12%                                                                                                                                                                     | Intra-individual variation   | (61)          |
| 37 CF                                     | 2                     | <0.0001                                                                                                                                                                 | sig. within subject variance | (33)          |
|                                           |                       | <0.0001                                                                                                                                                                 | sig. total variance          |               |
| 21 CF + non-CF                            | 2                     | r=0.988                                                                                                                                                                 |                              | (62)          |
| 165 CF + non-CF                           | 2                     | Cl <sup>-</sup> <40: 99%<br>Cl <sup>-</sup> >60: 100%<br>Cl <sup>-</sup> 40-60: ND                                                                                      | % agreement between 2 tests  | (63)          |

| <b>Table S5 online supplement: Sweat chloride discriminate validity</b>                                                      |                          |                                                   |                                                                |                                            |               |
|------------------------------------------------------------------------------------------------------------------------------|--------------------------|---------------------------------------------------|----------------------------------------------------------------|--------------------------------------------|---------------|
| <b>N and subject type</b>                                                                                                    |                          | <b>Comparison</b>                                 | <b>Result</b>                                                  | <b>Statistic</b>                           | <b>Author</b> |
| <i>The sweat chloride value allows discrimination between subjects with and without CF and also between subjects with CF</i> |                          |                                                   |                                                                |                                            |               |
| 55                                                                                                                           | CF (severe)              | CF (severe) vs. CF (mild)                         | p<0.001                                                        | ANOVA                                      | (26)          |
| 37                                                                                                                           | CF (mild)                | DB (0 CFTR) vs. Non-CF (healthy)                  | p<0.001                                                        |                                            |               |
| 85                                                                                                                           | DB (0 CFTR)              | DB (2 CFTR) vs. CF (mild)                         | p<0.05                                                         |                                            |               |
| 22                                                                                                                           | DB (1 CFTR)              | DB (2 CFTR) vs. DB (0 CFTR)                       | p<0.001                                                        |                                            |               |
| 15                                                                                                                           | DB (2 CFTR)              | DB (2 CFTR) vs. DB (1 CFTR)                       | p<0.01                                                         |                                            |               |
| 38                                                                                                                           | carriers (healthy)       |                                                   |                                                                |                                            |               |
| 26                                                                                                                           | non-CF (healthy)         |                                                   |                                                                |                                            |               |
| 17                                                                                                                           | CF with P. aeruginosa    | CF with P. aeruginosa vs CF without P. aeruginosa | First test p=0.004<br>Second test p=0.02                       | MWU                                        | (64)          |
| 17                                                                                                                           | CF without P. aeruginosa |                                                   |                                                                |                                            |               |
| 26                                                                                                                           | CF-PI                    | CF-PI vs. non-CF                                  | p<0.001                                                        | MWU                                        | (4)           |
| 24                                                                                                                           | CF-PS                    | CF-PS vs. non-CF                                  | NR                                                             |                                            |               |
| 31                                                                                                                           | non-CF                   | CF-PI vs. CF-PS                                   | p<0.001                                                        |                                            |               |
| 20                                                                                                                           | CF                       | CF vs. non CF                                     | p<0.0001                                                       | MWU                                        | (7)           |
| 52                                                                                                                           | carriers                 | CF vs. carrier                                    | p<0.0001                                                       |                                            |               |
| 32                                                                                                                           | non-CF                   | non-CF vs. carrier                                | p<0.01                                                         |                                            |               |
| 230                                                                                                                          | CF ΔF508                 | CF ΔF508 vs. CF-PS                                | p<0.0001                                                       | Wilcoxon                                   | (65)          |
| 34                                                                                                                           | CF-PS                    |                                                   |                                                                |                                            |               |
| 103                                                                                                                          | CF                       | CF vs. Non-CF                                     | Cut-off of 49mmol/L<br>Sensitivity =0.973<br>Specificity=0.973 | sensitivity and specificity                | (62)          |
| 184                                                                                                                          | non-CF                   |                                                   |                                                                |                                            |               |
| 115                                                                                                                          | CF                       | CF vs. non CF                                     | no overlap in 95%CI p<0.05*                                    | *unpaired t-test<br>**Wilcoxon<br>rank sum | (66)          |
| 128                                                                                                                          | carriers                 | CF vs. carrier                                    | no overlap in 95%CI p<0.05*                                    |                                            |               |
| 464                                                                                                                          | non-CF                   | non-CF vs. carrier                                | no overlap in 95%CI<br>p<0.05**                                |                                            |               |
| 20                                                                                                                           | CF                       | CF vs. non-CF                                     | sensitivity = 100%                                             | sensitivity and                            | (67)          |

|                                                                                                                                                                                                                                                                                         |                                             |                                                                                     |                    |                                  |      |
|-----------------------------------------------------------------------------------------------------------------------------------------------------------------------------------------------------------------------------------------------------------------------------------------|---------------------------------------------|-------------------------------------------------------------------------------------|--------------------|----------------------------------|------|
| 40                                                                                                                                                                                                                                                                                      | Non-CF                                      |                                                                                     | specificity = 100% | specificity                      |      |
| 8                                                                                                                                                                                                                                                                                       | CF                                          | CF vs non-CF                                                                        | P<0.001            | unpaired t-test                  | (68) |
| 7                                                                                                                                                                                                                                                                                       | non-CF                                      |                                                                                     |                    |                                  |      |
| <b>CF subjects with higher sweat chloride values have greater disease severity</b>                                                                                                                                                                                                      |                                             |                                                                                     |                    |                                  |      |
| 62                                                                                                                                                                                                                                                                                      | CF-PI (Cl <sup>-</sup> >60)                 | CF-PI younger at diagnosis                                                          | p=0.03             | MWU (CFTR dysfunction vs. CF-PS) | (69) |
| 103                                                                                                                                                                                                                                                                                     | CF-PS (Cl <sup>-</sup> >60)                 | CF-PI had higher frequency of isolation of <i>S. aureus</i> or <i>P. aeruginosa</i> | p=0.05             |                                  |      |
| 59                                                                                                                                                                                                                                                                                      | CFTR dysfunction (Cl <sup>-</sup> 30 to 60) | CF-PI had higher frequency of MI or DIOS                                            | p=0.05             |                                  |      |
|                                                                                                                                                                                                                                                                                         |                                             | CF-PI had higher frequency of liver disease                                         | p=0.04             |                                  |      |
| 54                                                                                                                                                                                                                                                                                      | ΔF508                                       | 621+1G→T vs. A455E                                                                  | p<0.05             | ANOVA                            | (70) |
| 40                                                                                                                                                                                                                                                                                      | 621+1G→T                                    | ΔF508 vs. A455E                                                                     | p<0.05             |                                  |      |
| 19                                                                                                                                                                                                                                                                                      | A455E                                       |                                                                                     |                    |                                  |      |
| 294                                                                                                                                                                                                                                                                                     | ΔF508/ ΔF508 (class II)                     |                                                                                     |                    | unpaired t-test                  | (71) |
| 20                                                                                                                                                                                                                                                                                      | ΔF508/splice (class I)                      | ΔF508/ ΔF508 vs ΔF508/splice                                                        | p<0.05             |                                  |      |
| 17                                                                                                                                                                                                                                                                                      | ΔF508/missense (class IV)                   | ΔF508/ ΔF508 vs ΔF508/missense                                                      | p<0.05             |                                  |      |
| <b>Sweat test Convergent Validity</b>                                                                                                                                                                                                                                                   |                                             |                                                                                     |                    |                                  |      |
| <i>There is excellent correlation between sweat chloride values determined by the original Gibson-Cooke method with gauze collection and the adapted Macroduct sweat collection system. When comparing both methods by Bland-Altman plot, the limits of agreement are however wide.</i> |                                             |                                                                                     |                    |                                  |      |
| 20                                                                                                                                                                                                                                                                                      | CF                                          | gauze vs. Macroduct                                                                 | r =0.93, p<0.0001  | linear regression                | (72) |
| 41                                                                                                                                                                                                                                                                                      | Questionable CF                             |                                                                                     | 0                  | mean difference                  |      |
| 7                                                                                                                                                                                                                                                                                       | Carrier                                     |                                                                                     | -20 to +20         | 95% limits of agreement          |      |
| 14                                                                                                                                                                                                                                                                                      | Non CF                                      |                                                                                     |                    |                                  |      |
| 1014                                                                                                                                                                                                                                                                                    | CF and non-CF                               | gauze vs. Macroduct                                                                 | r=0.99, p=NR       | linear regression                | (73) |

|     |                         |                     |                     |                        |      |
|-----|-------------------------|---------------------|---------------------|------------------------|------|
| 150 | Infants<br>4-6 weeks dd | gauze vs. Macroduct | 11.2 (8-13) mmol/L  | median (IQR)           | (74) |
|     |                         |                     | -1 mmol/L           | mean difference        |      |
|     |                         |                     | -10.8 to 9.8 mmol/L | limits of<br>agreement |      |

|                                              |              |                     |                          |                     |      |
|----------------------------------------------|--------------|---------------------|--------------------------|---------------------|------|
| 103<br>184                                   | CF<br>Non-CF | gauze vs. Macroduct | R=0.988                  | not reported        | (62) |
|                                              |              |                     | 21mmol/L                 | mean difference     |      |
|                                              |              |                     | 38.6 to 3.3              | limits of agreement |      |
| 94<br>86                                     | CF<br>non-CF | gauze vs. Macroduct | r=0.987                  | not reported        | (62) |
|                                              |              |                     | -11.7 to 14.0            | limits of agreement |      |
| <b>Sweat chloride normal values</b>          |              |                     |                          |                     |      |
| chloride > 60 mmol/L                         |              |                     | consistent with CF       | (75-78)             |      |
| chloride < 40 mmol/L (<30mmol/L for infants) |              |                     | negative                 |                     |      |
| chloride 40-60 mmol/L                        |              |                     | borderline/indeterminate |                     |      |

DB = diffuse idiopathic bronchiectasis

**Table S6 online supplement: Clinimetric properties for intestinal current measurement**

| N and subject type                                                                                                                                                                        | Result                                                                                                                                                                                                                         | Statistic       | Author |
|-------------------------------------------------------------------------------------------------------------------------------------------------------------------------------------------|--------------------------------------------------------------------------------------------------------------------------------------------------------------------------------------------------------------------------------|-----------------|--------|
| <b>Reliability</b><br><i>No data available</i>                                                                                                                                            |                                                                                                                                                                                                                                |                 |        |
| <b>Discriminate Validity</b>                                                                                                                                                              |                                                                                                                                                                                                                                |                 |        |
| <i>Chloride secretion measured with ICM discriminates CF from normal and also discriminates between patients with CF (CF-PI vs. CF-PS, F508del homozygotes vs. F508del heterozygotes)</i> |                                                                                                                                                                                                                                |                 |        |
| 47 CF (34 CF-PI; 13 CF-PS)<br>28 Non-CF                                                                                                                                                   | Cumulative chloride response ( $\Delta$ Isc carbachol + cAMP + histamine)<br>> 34 $\mu$ A/cm <sup>2</sup> is non-CF<br>< 34 $\mu$ A/cm <sup>2</sup> is CF<br>100% sensitivity and 100% specificity in cohort of known patients | MWU             | (79)   |
| 45 CF<br>13 carriers<br>19 non-CF                                                                                                                                                         | $\Delta$ Isc cAMP<br>p<0.05 CF vs carrier<br>p<0.05 CF vs non-CF                                                                                                                                                               | unpaired t-test | (80)   |
| 8 CF<br>26 non-CF                                                                                                                                                                         | $\Delta$ Isc amiloride<br>p<0.05 CF vs non-CF<br>$\Delta$ Isc carbachol<br>P<0.05 CF vs non-CF                                                                                                                                 | unpaired t-test | (81)   |
| 14 CF<br>34 non-CF                                                                                                                                                                        | $\Delta$ Isc amiloride<br>p<0.0001 CF vs non-CF<br>$\Delta$ Isc amiloride + IBXM/forskolin<br>p<0.0001 CF vs non-CF                                                                                                            | unpaired t-test | (82)   |
| 42 CF-PI<br>9 CF-PS                                                                                                                                                                       | $\Delta$ Isc carbachol<br>p <0.01 CF-PI vs CF-PS                                                                                                                                                                               | MWU             | (83)   |
| 12 F508del homozygous<br>8 F508del heterozygous<br>28 non-CF                                                                                                                              | $\Delta$ Isc acetylcholine<br>p<0.05 homozygous vs. heterozygous                                                                                                                                                               | MWU             | (84)   |
| 5 CF                                                                                                                                                                                      | $\Delta$ Isc acetylcholine                                                                                                                                                                                                     | unpaired t-     | (85)   |



|                                                                                                               |                                                                                              |                                                                                                                                                                                                                                                                                                                                                                                                                 |                                                                                 |      |
|---------------------------------------------------------------------------------------------------------------|----------------------------------------------------------------------------------------------|-----------------------------------------------------------------------------------------------------------------------------------------------------------------------------------------------------------------------------------------------------------------------------------------------------------------------------------------------------------------------------------------------------------------|---------------------------------------------------------------------------------|------|
| 12                                                                                                            | non-CF                                                                                       | P<0.01 CF vs non-CF                                                                                                                                                                                                                                                                                                                                                                                             | test                                                                            |      |
| 6                                                                                                             | CF                                                                                           | $\Delta$ Isc acetylcholine                                                                                                                                                                                                                                                                                                                                                                                      | Fisher's                                                                        | (86) |
| 6                                                                                                             | non-CF                                                                                       | p<0.05 CF vs non-CF<br>$\Delta$ Isc prostaglandin E2<br>p<0.05 CF vs non-CF                                                                                                                                                                                                                                                                                                                                     | exact t-test                                                                    |      |
| 3                                                                                                             | CF                                                                                           | $\Delta$ Isc to secretagogues                                                                                                                                                                                                                                                                                                                                                                                   | Descriptive                                                                     | (87) |
| 5                                                                                                             | non-CF                                                                                       | Zero response in CF                                                                                                                                                                                                                                                                                                                                                                                             |                                                                                 |      |
| <i>Residual chloride secretion on ICM is highly indicative of milder disease compared to absent secretion</i> |                                                                                              |                                                                                                                                                                                                                                                                                                                                                                                                                 |                                                                                 |      |
| 45                                                                                                            | CF<br>27 CF <sub>absent</sub><br>18 CF <sub>residual</sub>                                   | CF <sub>residual</sub> were older at diagnosis p<0.0001 <sub>b</sub><br>CF <sub>residual</sub> had lower sweat chloride p=0.01 <sub>a</sub><br>CF <sub>residual</sub> had higher weight for height p=0.03 <sub>a</sub><br>CF <sub>residual</sub> had higher frequency of pancreatic sufficiency<br>p<0.0001 <sub>c</sub><br>CF <sub>residual</sub> had higher FVC & FEV <sub>1</sub> %pred at age 20 yrs p<0.05 | <sup>a</sup> unpaired t-test<br><sup>b</sup> MWU<br><sup>c</sup> X <sup>2</sup> | (80) |
| 51                                                                                                            | CF<br>30 CF <sub>absent</sub><br>11 CF <sub>residual</sub><br>10 CF <sub>high residual</sub> | CF <sub>residual</sub> and CF <sub>high residual</sub> older at diagnosis p<.01, <0.05<br>CF <sub>residual</sub> and CF <sub>high residual</sub> higher frequency of pancreatic sufficiency p<.001                                                                                                                                                                                                              | MWU                                                                             | (83) |
| <b>Convergent Validity</b>                                                                                    |                                                                                              |                                                                                                                                                                                                                                                                                                                                                                                                                 |                                                                                 |      |
| <i>The ICM result is convergent with the CFTR mutation analysis result</i>                                    |                                                                                              |                                                                                                                                                                                                                                                                                                                                                                                                                 |                                                                                 |      |
| $\Delta$ Isc carbachol + cAMP + histamine (< 34 $\mu$ A/cm <sup>2</sup> = CF)                                 |                                                                                              |                                                                                                                                                                                                                                                                                                                                                                                                                 |                                                                                 |      |
| 61                                                                                                            | Questionable CF<br>6 CF<br>55 CF unlikely                                                    | 100% classified as CF had two mutations<br>1.8% classified as "CF unlikely" had two mutations                                                                                                                                                                                                                                                                                                                   | Descriptive                                                                     | (79) |
| 45                                                                                                            | CF                                                                                           | $\Delta$ F508 homozygous - no residual chloride secretion<br>At least one mild mutation - absent or residual chloride secretion                                                                                                                                                                                                                                                                                 | Descriptive                                                                     | (80) |
| 51                                                                                                            | CF                                                                                           | CF subjects with 1 A455E mutation have greater carbachol induced chloride secretion (p=0.01)                                                                                                                                                                                                                                                                                                                    | MWU                                                                             | (83) |
| <i>The ICM result is convergent with the sweat chloride</i>                                                   |                                                                                              |                                                                                                                                                                                                                                                                                                                                                                                                                 |                                                                                 |      |
| 47                                                                                                            | CF                                                                                           | Cumulative chloride response ( $\Delta$ Isc carbachol + cAMP +                                                                                                                                                                                                                                                                                                                                                  | Pearson                                                                         | (79) |

|                                                                                             |                        |             |  |
|---------------------------------------------------------------------------------------------|------------------------|-------------|--|
|                                                                                             | histamine)<br>r = 0.61 | correlation |  |
| <b>Responsiveness</b><br><i>No data available</i>                                           |                        |             |  |
| <b>Reference values</b><br><i>See Table 1 – Derichs et al Thorax 2010; 65: 594-599 (79)</i> |                        |             |  |

## References On line supplement

1. Vermeulen F, Proesmans M, Feyaerts N, De Boeck K. Nasal potential measurements on the nasal floor and under the inferior turbinate: does it matter? *Pediatr Pulmonol* 2011; 46(2): 145-152.
2. Middleton PG, House HH. Measurement of airway ion transport assists the diagnosis of cystic fibrosis. *Pediatr Pulmonol* 2010; 45(8): 789-795.
3. Yaakov Y, Kerem E, Yahav Y, Rivlin J, Blau H, Bentur L, Aviram M, Picard E, Bdolah-Abram T, Wilschanski M. Reproducibility of nasal potential difference measurements in cystic fibrosis. *Chest* 2007; 132(4): 1219-1226.
4. Wilschanski M, Dupuis A, Ellis L, Jarvi K, Zielenski J, Tullis E, Martin S, Corey M, Tsui LC, Durie P. Mutations in the cystic fibrosis transmembrane regulator gene and in vivo transepithelial potentials. *Am J Respir Crit Care Med* 2006; 174(7): 787-794.
5. Davies MG, Geddes DM, Alton EW. The effect of varying tonicity on nasal epithelial ion transport in cystic fibrosis. *Am J Respir Crit Care Med* 2005; 171(7): 760-763.
6. Wilschanski M, Famini H, Strauss-Liviatan N, Rivlin J, Blau H, Bibi H, Bentur L, Yahav Y, Springer H, Kramer MR, Klar A, Ilani A, Kerem B, Kerem E. Nasal potential difference measurements in patients with atypical cystic fibrosis. *Eur Respir J* 2001; 17(6): 1208-1215.
7. Sermet-Gaudelus I, Dechaux M, Vallee B, Fajac A, Girodon E, Nguyen-Khoa T, Marianovski R, Hurbain I, Bresson JL, Lenoir G, Edelman A. Chloride transport in nasal ciliated cells of cystic fibrosis heterozygotes. *Am J Respir Crit Care Med* 2005; 171(9): 1026-1031.
8. Fajac I, Hubert D, Guillemot D, Honore I, Bienvenu T, Volter F, Dall'Ava-Santucci J, Dusser DJ. Nasal airway ion transport is linked to the cystic fibrosis phenotype in adult patients. *Thorax* 2004; 59(11): 971-976.
9. Wallace HL, Barker PM, Southern KW. Nasal airway ion transport and lung function in young people with cystic fibrosis. *Am J Respir Crit Care Med* 2003; 168(5): 594-600.
10. Walker LC, Venglarik CJ, Aubin G, Weatherly MR, McCarty NA, Lesnick B, Ruiz F, Clancy JP, Sorscher EJ. Relationship between airway ion transport and a mild pulmonary disease mutation in CFTR. *Am J Respir Crit Care Med* 1997; 155(5): 1684-1689.
11. Duperrex O, Berclaz PY, Bertrand D, Lacroix JS, Pochon N, Belli D, Rochat T. A new device for in vivo measurement of nasal transepithelial potential difference in cystic fibrosis patients and normal subjects. *Eur Respir J* 1997; 10(7): 1631-1636.
12. Hofmann T, Bohmer O, Huls G, Terbrack HG, Bittner P, Klingmuller V, Heerd E, Lindemann H. Conventional and modified nasal potential-difference measurement in cystic fibrosis. *Am J Respir Crit Care Med* 1997; 155(6): 1908-1913.
13. Zabner J, Ramsey BW, Meeker DP, Aitken ML, Balfour RP, Gibson RL, Launspach J, Moscicki RA, Richards SM, Standaert TA, et al. Repeat administration of an adenovirus vector encoding cystic fibrosis transmembrane conductance regulator to the nasal epithelium of patients with cystic fibrosis. *J Clin Invest* 1996; 97(6): 1504-1511.
14. Hay JG, McElvaney NG, Herena J, Crystal RG. Modification of nasal epithelial potential differences of individuals with cystic fibrosis consequent to local administration of a normal CFTR cDNA adenovirus gene transfer vector. *Hum Gene Ther* 1995; 6(11): 1487-1496.
15. Knowles MR, Paradiso AM, Boucher RC. In vivo nasal potential difference: techniques and protocols for assessing efficacy of gene transfer in cystic fibrosis. *Hum Gene Ther* 1995; 6(4): 445-455.
16. Middleton PG, Geddes DM, Alton EW. Protocols for in vivo measurement of the ion transport defects in cystic fibrosis nasal epithelium. *Eur Respir J* 1994; 7(11): 2050-2056.

17. Alsuwaidan S, Li Wan Po A, Morrison G, Redmond A, Dodge JA, McElnay J, Stewart E, Stanford CF. Effect of exercise on the nasal transmucosal potential difference in patients with cystic fibrosis and normal subjects. *Thorax* 1994; 49(12): 1249-1250.
18. Osborne LR, Lynch M, Middleton PG, Alton EW, Geddes DM, Pryor JP, Hodson ME, Santis GK. Nasal epithelial ion transport and genetic analysis of infertile men with congenital bilateral absence of the vas deferens. *Hum Mol Genet* 1993; 2(10): 1605-1609.
19. Alton EW, Currie D, Logan-Sinclair R, Warner JO, Hodson ME, Geddes DM. Nasal potential difference: a clinical diagnostic test for cystic fibrosis. *Eur Respir J* 1990; 3(8): 922-926.
20. Alton EW, Hay JG, Munro C, Geddes DM. Measurement of nasal potential difference in adult cystic fibrosis, Young's syndrome, and bronchiectasis. *Thorax* 1987; 42(10): 815-817.
21. Sauder RA, Chesrown SE, Loughlin GM. Clinical application of transepithelial potential difference measurements in cystic fibrosis. *J Pediatr* 1987; 111(3): 353-358.
22. Gowen CW, Lawson EE, Gingras-Leatherman J, Gatzky JT, Boucher RC, Knowles MR. Increased nasal potential difference and amiloride sensitivity in neonates with cystic fibrosis. *J Pediatr* 1986; 108(4): 517-521.
23. Hay JG, Geddes DM. Transepithelial potential difference in cystic fibrosis. *Thorax* 1985; 40(7): 493-496.
24. Knowles M, Gatzky J, Boucher R. Relative ion permeability of normal and cystic fibrosis nasal epithelium. *J Clin Invest* 1983; 71(5): 1410-1417.
25. Knowles MR, Carson JL, Collier AM, Gatzky JT, Boucher RC. Measurements of nasal transepithelial electric potential differences in normal human subjects in vivo. *Am Rev Respir Dis* 1981; 124(4): 484-490.
26. Bienvenu T, Sermet-Gaudelus I, Burgel PR, Hubert D, Crestani B, Bassinet L, Dusser D, Fajac I. Cystic fibrosis transmembrane conductance regulator channel dysfunction in non-cystic fibrosis bronchiectasis. *Am J Respir Crit Care Med* 2010; 181(10): 1078-1084.
27. Leal T, Fajac I, Wallace HL, Lebecque P, Lebacq J, Hubert D, Dall'Ava J, Dusser D, Ganesan AP, Knoop C, Cumps J, Wallemacq P, Southern KW. Airway ion transport impacts on disease presentation and severity in cystic fibrosis. *Clin Biochem* 2008; 41(10-11): 764-772.
28. Bronsveld I, Mekus F, Bijman J, Ballmann M, de Jonge HR, Laabs U, Halley DJ, Ellemunter H, Mastella G, Thomas S, Veeze HJ, Tummler B. Chloride conductance and genetic background modulate the cystic fibrosis phenotype of Delta F508 homozygous twins and siblings. *J Clin Invest* 2001; 108(11): 1705-1715.
29. Ho LP, Samways JM, Porteous DJ, Dorin JR, Carothers A, Greening AP, Innes JA. Correlation between nasal potential difference measurements, genotype and clinical condition in patients with cystic fibrosis. *Eur Respir J* 1997; 10(9): 2018-2022.
30. Jaron R, Yaakov Y, Rivlin J, Blau H, Bentur L, Yahav Y, Kerem E, Bibi H, Picard E, Wilschanski M. Nasal potential difference in non-classic cystic fibrosis-long term follow up. *Pediatr Pulmonol* 2008; 43(6): 545-549.
31. Sermet-Gaudelus I, Girodon E, Sands D, Stremmler N, Vavrova V, Deneuville E, Reix P, Bui S, Huet F, Lebourgeois M, Munck A, Iron A, Skalicka V, Bienvenu T, Roussel D, Lenoir G, Bellon G, Sarles J, Macek M, Roussey M, Fajac I, Edelman A. Clinical phenotype and genotype of children with borderline sweat test and abnormal nasal epithelial chloride transport. *Am J Respir Crit Care Med* 2010; 182(7): 929-936.
32. Sermet-Gaudelus I, Girodon E, Roussel D, Deneuville E, Bui S, Huet F, Guillot M, Aboutaam R, Renouil M, Munck A, des Georges M, Iron A, Thauvin-Robinet C, Fajac I, Lenoir G, Roussey M, Edelman A. Measurement of nasal potential difference in young children with an equivocal sweat test following newborn screening for cystic fibrosis. *Thorax* 2010; 65(6): 539-544.

33. Ahrens RC, Standaert TA, Launspach J, Han SH, Teresi ME, Aitken ML, Kelley TJ, Hilliard KA, Milgram LJ, Konstan MW, Weatherly MR, McCarty NA. Use of nasal potential difference and sweat chloride as outcome measures in multicenter clinical trials in subjects with cystic fibrosis. *Pediatr Pulmonol* 2002; 33(2): 142-150.
34. Clancy JP, Rowe SM, Bebok Z, Aitken ML, Gibson R, Zeitlin P, Berclaz P, Moss R, Knowles MR, Oster RA, Mayer-Hamblett N, Ramsey B. No detectable improvements in cystic fibrosis transmembrane conductance regulator by nasal aminoglycosides in patients with cystic fibrosis with stop mutations. *Am J Respir Cell Mol Biol* 2007; 37(1): 57-66.
35. Delmarco A, Pradal U, Cabrini G, Bonizzato A, Mastella G. Nasal potential difference in cystic fibrosis patients presenting borderline sweat test. *Eur Respir J* 1997; 10(5): 1145-1149.
36. Fajac I, Hubert D, Bienvenu T, Richaud-Thiriez B, Matran R, Kaplan JC, Dall'Ava-Santucci J, Dusser DJ. Relationships between nasal potential difference and respiratory function in adults with cystic fibrosis. *Eur Respir J* 1998; 12(6): 1295-1300.
37. Gill DR, Southern KW, Mofford KA, Seddon T, Huang L, Sorgi F, Thomson A, MacVinish LJ, Ratcliff R, Bilton D, Lane DJ, Littlewood JM, Webb AK, Middleton PG, Colledge WH, Cuthbert AW, Evans MJ, Higgins CF, Hyde SC. A placebo-controlled study of liposome-mediated gene transfer to the nasal epithelium of patients with cystic fibrosis. *Gene Ther* 1997; 4(3): 199-209.
38. Gilljam M, Ellis L, Corey M, Zielenski J, Durie P, Tullis DE. Clinical manifestations of cystic fibrosis among patients with diagnosis in adulthood. *Chest* 2004; 126(4): 1215-1224.
39. Hebestreit A, Kersting U, Basler B, Jeschke R, Hebestreit H. Exercise inhibits epithelial sodium channels in patients with cystic fibrosis. *Am J Respir Crit Care Med* 2001; 164(3): 443-446.
40. Hofmann T, Stutts MJ, Ziersch A, Ruckes C, Weber WM, Knowles MR, Lindemann H, Boucher RC. Effects of topically delivered benzamil and amiloride on nasal potential difference in cystic fibrosis. *Am J Respir Crit Care Med* 1998; 157(6 Pt 1): 1844-1849.
41. Kerem E, Hirawat S, Armoni S, Yaakov Y, Shoseyov D, Cohen M, Nissim-Rafinia M, Blau H, Rivlin J, Aviram M, Elfring GL, Northcutt VJ, Miller LL, Kerem B, Wilschanski M. Effectiveness of PTC124 treatment of cystic fibrosis caused by nonsense mutations: a prospective phase II trial. *Lancet* 2008; 372(9640): 719-727.
42. Knowles M, Gatzky J, Boucher R. Increased bioelectric potential difference across respiratory epithelia in cystic fibrosis. *N Engl J Med* 1981; 305(25): 1489-1495.
43. Konstan MW, Davis PB, Wagener JS, Hilliard KA, Stern RC, Milgram LJ, Kowalczyk TH, Hyatt SL, Fink TL, Gedeon CR, Oette SM, Payne JM, Muhammad O, Ziady AG, Moen RC, Cooper MJ. Compacted DNA nanoparticles administered to the nasal mucosa of cystic fibrosis subjects are safe and demonstrate partial to complete cystic fibrosis transmembrane regulator reconstitution. *Hum Gene Ther* 2004; 15(12): 1255-1269.
44. Pradal U, Castellani C, Delmarco A, Mastella G. Nasal potential difference in congenital bilateral absence of the vas deferens. *Am J Respir Crit Care Med* 1998; 158(3): 896-901.
45. Rodgers HC, Knox AJ. The effect of topical benzamil and amiloride on nasal potential difference in cystic fibrosis. *Eur Respir J* 1999; 14(3): 693-696.
46. Rubenstein RC, Zeitlin PL. A pilot clinical trial of oral sodium 4-phenylbutyrate (Buphenyl) in deltaF508-homozygous cystic fibrosis patients: partial restoration of nasal epithelial CFTR function. *Am J Respir Crit Care Med* 1998; 157(2): 484-490.
47. Sermet-Gaudelus I, Renouil M, Fajac A, Bidou L, Parbaille B, Pierrot S, Davy N, Bismuth E, Reinert P, Lenoir G, Lesure JF, Rousset JP, Edelman A. In vitro prediction of stop-codon suppression by intravenous gentamicin in patients with cystic fibrosis: a pilot study. *BMC Med* 2007; 5: 5.

48. Sermet-Gaudelus I, Boeck KD, Casimir GJ, Vermeulen F, Leal T, Mogenet A, Roussel D, Fritsch J, Hanssens L, Hirawat S, Miller NL, Constantine S, Reha A, Ajayi T, Elfring GL, Miller LL. Ataluren (PTC124) induces cystic fibrosis transmembrane conductance regulator protein expression and activity in children with nonsense mutation cystic fibrosis. *Am J Respir Crit Care Med* 2010; 182(10): 1262-1272.
49. Smith SN, Middleton PG, Chadwick S, Jaffe A, Bush KA, Rolleston S, Farley R, Delaney SJ, Wainwright B, Geddes DM, Alton EW. The in vivo effects of milrinone on the airways of cystic fibrosis mice and human subjects. *Am J Respir Cell Mol Biol* 1999; 20(1): 129-134.
50. Southern KW, Noone PG, Bosworth DG, Legrys VA, Knowles MR, Barker PM. A modified technique for measurement of nasal transepithelial potential difference in infants. *J Pediatr* 2001; 139(3): 353-358.
51. Standaert TA, Boitano L, Emerson J, Milgram LJ, Konstan MW, Hunter J, Berclaz PY, Brass L, Zeitlin PL, Hammond K, Davies Z, Foy C, Noone PG, Knowles MR. Standardized procedure for measurement of nasal potential difference: an outcome measure in multicenter cystic fibrosis clinical trials. *Pediatr Pulmonol* 2004; 37(5): 385-392.
52. Wilschanski M, Famini C, Blau H, Rivlin J, Augarten A, Avital A, Kerem B, Kerem E. A pilot study of the effect of gentamicin on nasal potential difference measurements in cystic fibrosis patients carrying stop mutations. *Am J Respir Crit Care Med* 2000; 161(3 Pt 1): 860-865.
53. Wilschanski M, Yahav Y, Yaacov Y, Blau H, Bentur L, Rivlin J, Aviram M, Bdolah-Abram T, Bebok Z, Shushi L, Kerem B, Kerem E. Gentamicin-induced correction of CFTR function in patients with cystic fibrosis and CFTR stop mutations. *N Engl J Med* 2003; 349(15): 1433-1441.
54. Wilson DC, Ellis L, Zielenski J, Corey M, Ip WF, Tsui LC, Tullis E, Knowles MR, Durie PR. Uncertainty in the diagnosis of cystic fibrosis: possible role of in vivo nasal potential difference measurements. *J Pediatr* 1998; 132(4): 596-599.
55. Zeitlin PL, Boyle MP, Guggino WB, Molina L. A phase I trial of intranasal Moli1901 for cystic fibrosis. *Chest* 2004; 125(1): 143-149.
56. Boyle MP, Diener-West M, Milgram L, Knowles M, Foy C, Zeitlin P, Standaert T. A multicenter study of the effect of solution temperature on nasal potential difference measurements. *Chest* 2003; 124(2): 482-489.
57. Lebecque P, Leal T, De Boeck C, Jaspers M, Cuppens H, Cassiman JJ. Mutations of the cystic fibrosis gene and intermediate sweat chloride levels in children. *Am J Respir Crit Care Med* 2002; 165(6): 757-761.
58. Solomon GM, Konstan MW, Wilschanski M, Billings J, Sermet-Gaudelus I, Accurso F, Vermeulen F, Levin E, Hathorne H, Reeves G, Sabbatini G, Hill A, Mayer-Hamblett N, Ashlock M, Clancy JP, Rowe SM. An international randomized multicenter comparison of nasal potential difference techniques. *Chest* 2010; 138(4): 919-928.
59. Mackay RJ, Florkowski CM, George PM, Sies CW, Woods S. Uncertainty of sweat chloride testing: does the right hand know what the left hand is doing? *Ann Clin Biochem* 2008; 45(Pt 6): 535-538.
60. Koerbin G, Greaves RF, Robins H, Farquhar J, Hickman PE. Total intra-individual variation in sweat sodium and chloride concentrations for the diagnosis of cystic fibrosis. *Clin Chim Acta* 2008; 393(2): 128-129.
61. Losty HC, Wheatley H, Doull I. The evaluation of a novel conductometric device for the diagnosis of cystic fibrosis. *Ann Clin Biochem* 2006; 43(Pt 5): 375-381.
62. Mastella G, Di Cesare G, Borruso A, Menin L, Zanolla L. Reliability of sweat-testing by the Macroduct collection method combined with conductivity analysis in comparison with the classic Gibson and Cooke technique. *Acta Paediatr* 2000; 89(8): 933-937.

63. Warwick WJ, Huang NN, Waring WW, Cherian AG, Brown I, Stejskal-Lorenz E, Yeung WH, Duhon G, Hill JG, Strominger D. Evaluation of a cystic fibrosis screening system incorporating a miniature sweat stimulator and disposable chloride sensor. *Clin Chem* 1986; 32(5): 850-853.
64. Paschoal IA, de Oliveira Villalba W, Bertuzzo CS, Cerqueira EM, Pereira MC. Cystic fibrosis in adults. *Lung* 2007; 185(2): 81-87.
65. Davis PB, Schluchter MD, Konstan MW. Relation of sweat chloride concentration to severity of lung disease in cystic fibrosis. *Pediatr Pulmonol* 2004; 38(3): 204-209.
66. Farrell PM, Kosciak RE. Sweat chloride concentrations in infants homozygous or heterozygous for F508 cystic fibrosis. *Pediatrics* 1996; 97(4): 524-528.
67. Hall SK, Stableforth DE, Green A. Sweat sodium and chloride concentrations--essential criteria for the diagnosis of cystic fibrosis in adults. *Ann Clin Biochem* 1990; 27 ( Pt 4): 318-320.
68. Quinton PM, Bijman J. Higher bioelectric potentials due to decreased chloride absorption in the sweat glands of patients with cystic fibrosis. *N Engl J Med* 1983; 308(20): 1185-1189.
69. Goubau C, Wilschanski M, Skalicka V, Lebecque P, Southern KW, Sermet I, Munck A, Derichs N, Middleton PG, Hjelte L, Padoan R, Vasar M, De Boeck K. Phenotypic characterisation of patients with intermediate sweat chloride values: towards validation of the European diagnostic algorithm for cystic fibrosis. *Thorax* 2009; 64(8): 683-691.
70. De Braekeleer M, Allard C, Leblanc JP, Aubin G, Simard F. Correlation of sweat chloride concentration with genotypes in cystic fibrosis patients in Saguenay Lac-Saint-Jean, Quebec, Canada. *Clin Biochem* 1998; 31(1): 33-36.
71. Wilschanski M, Zielenski J, Markiewicz D, Tsui LC, Corey M, Levison H, Durie PR. Correlation of sweat chloride concentration with classes of the cystic fibrosis transmembrane conductance regulator gene mutations. *J Pediatr* 1995; 127(5): 705-710.
72. Rose JB, Ellis L, John B, Martin S, Gonska T, Solomon M, Tullis E, Corey M, Adeli K, Durie PR. Does the Macroduct collection system reliably define sweat chloride concentration in subjects with intermediate results? *Clin Biochem* 2009; 42(12): 1260-1264.
73. Hammond KB, Turcios NL, Gibson LE. Clinical evaluation of the macroduct sweat collection system and conductivity analyzer in the diagnosis of cystic fibrosis. *J Pediatr* 1994; 124(2): 255-260.
74. Jayaraj R, Barton PV, Newland P, Mountford R, Shaw NJ, McCarthy E, Isherwood DM, Southern KW. A reference interval for sweat chloride in infants aged between five and six weeks of age. *Ann Clin Biochem* 2009; 46(Pt 1): 73-78.
75. LeGrys VA, Yankaskas JR, Quittell LM, Marshall BC, Mogayzel PJ, Jr. Diagnostic sweat testing: the Cystic Fibrosis Foundation guidelines. *J Pediatr* 2007; 151(1): 85-89.
76. Rosenstein BJ, Cutting GR. The diagnosis of cystic fibrosis: a consensus statement. Cystic Fibrosis Foundation Consensus Panel. *J Pediatr* 1998; 132(4): 589-595.
77. Taccetti G, Festini F, Braccini G, Campana S, de Martino M. Sweat testing in newborns positive to neonatal screening for cystic fibrosis. *Arch Dis Child Fetal Neonatal Ed* 2004; 89(5): F463-464.
78. Parad RB, Comeau AM, Dorkin HL, Dovey M, Gerstle R, Martin T, O'Sullivan BP. Sweat testing infants detected by cystic fibrosis newborn screening. *J Pediatr* 2005; 147(3 Suppl): S69-72.
79. Derichs N, Sanz J, Von Kanel T, Stolpe C, Zapf A, Tummler B, Gallati S, Ballmann M. Intestinal current measurement for diagnostic classification of patients with questionable cystic fibrosis: validation and reference data. *Thorax* 2010; 65(7): 594-599.
80. Hirtz S, Gonska T, Seydewitz HH, Thomas J, Greiner P, Kuehr J, Brandis M, Eichler I, Rocha H, Lopes AI, Barreto C, Ramalho A, Amaral MD, Kunzelmann K, Mall M. CFTR

Cl<sup>-</sup> channel function in native human colon correlates with the genotype and phenotype in cystic fibrosis. *Gastroenterology* 2004; 127(4): 1085-1095.

81. Mall M, Wissner A, Seydewitz HH, Kuehr J, Brandis M, Greger R, Kunzelmann K. Defective cholinergic Cl<sup>-</sup> secretion and detection of K<sup>+</sup> secretion in rectal biopsies from cystic fibrosis patients. *Am J Physiol Gastrointest Liver Physiol* 2000; 278(4): G617-624.

82. Mall M, Bleich M, Kuehr J, Brandis M, Greger R, Kunzelmann K. CFTR-mediated inhibition of epithelial Na<sup>+</sup> conductance in human colon is defective in cystic fibrosis. *Am J Physiol* 1999; 277(3 Pt 1): G709-716.

83. Veeze HJ, Halley DJ, Bijman J, de Jongste JC, de Jonge HR, Sinaasappel M. Determinants of mild clinical symptoms in cystic fibrosis patients. Residual chloride secretion measured in rectal biopsies in relation to the genotype. *J Clin Invest* 1994; 93(2): 461-466.

84. Taylor CJ, Hughes H, Hardcastle PT, Hardcastle J. Genotype and secretory response in cystic fibrosis. *Lancet* 1992; 339(8784): 67-68.

85. Hardcastle J, Hardcastle PT, Taylor CJ, Goldhill J. Failure of cholinergic stimulation to induce a secretory response from the rectal mucosa in cystic fibrosis. *Gut* 1991; 32(9): 1035-1039.

86. Taylor CJ, Baxter PS, Hardcastle J, Hardcastle PT. Failure to induce secretion in jejunal biopsies from children with cystic fibrosis. *Gut* 1988; 29(7): 957-962.

87. Berschneider HM, Knowles MR, Azizkhan RG, Boucher RC, Tobey NA, Orlando RC, Powell DW. Altered intestinal chloride transport in cystic fibrosis. *FASEB J* 1988; 2(10): 2625-2629.
